# Supplementary material for: Prospective study on the Eustachian tube function during Frenzel maneuver in a hypobaric/hyperbaric pressure chamber
Source: PubMed Central journal article supplement (PMC8930945; doi:10.1007/s00405-021-06888-1), 2021-06-06

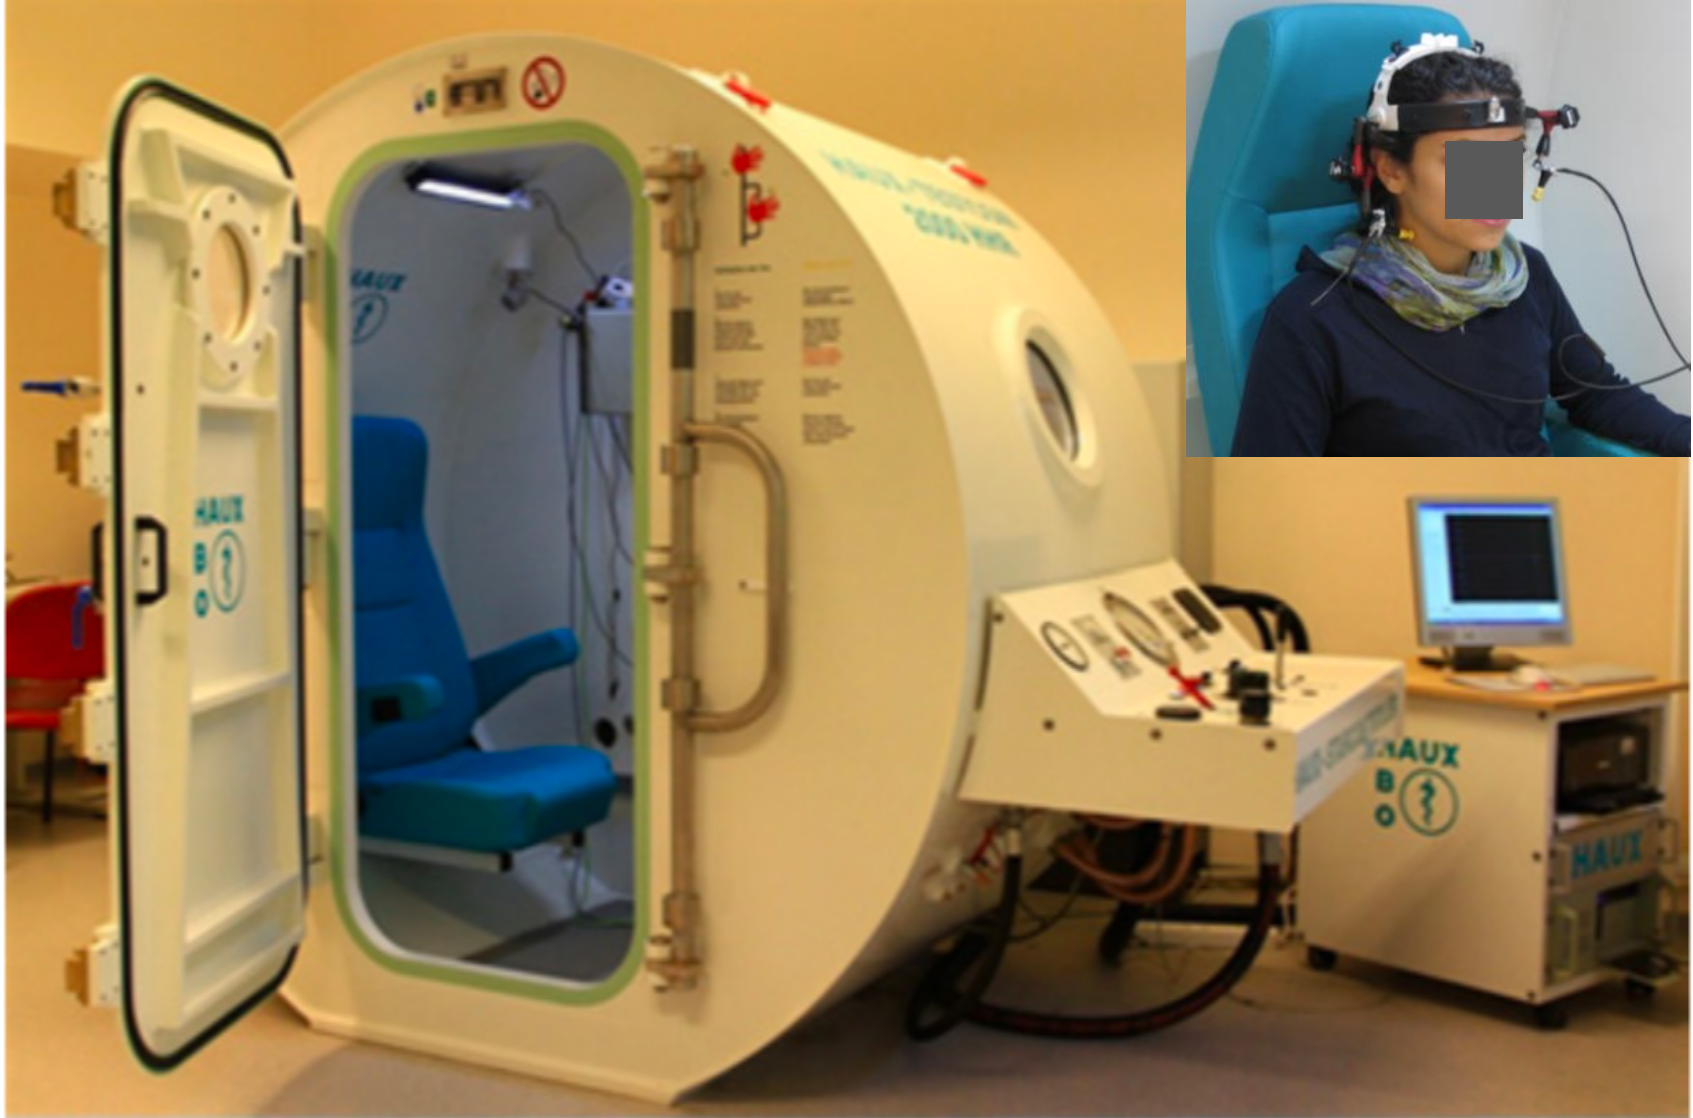

Supplement: 405_2021_6888_MOESM1_ESM.pdf [file 405_2021_6888_MOESM1_ESM.pdf]
